# Supplementary material
Source: PubMed Central journal article supplement (PMC7609637)

# Supplementary Figure 1

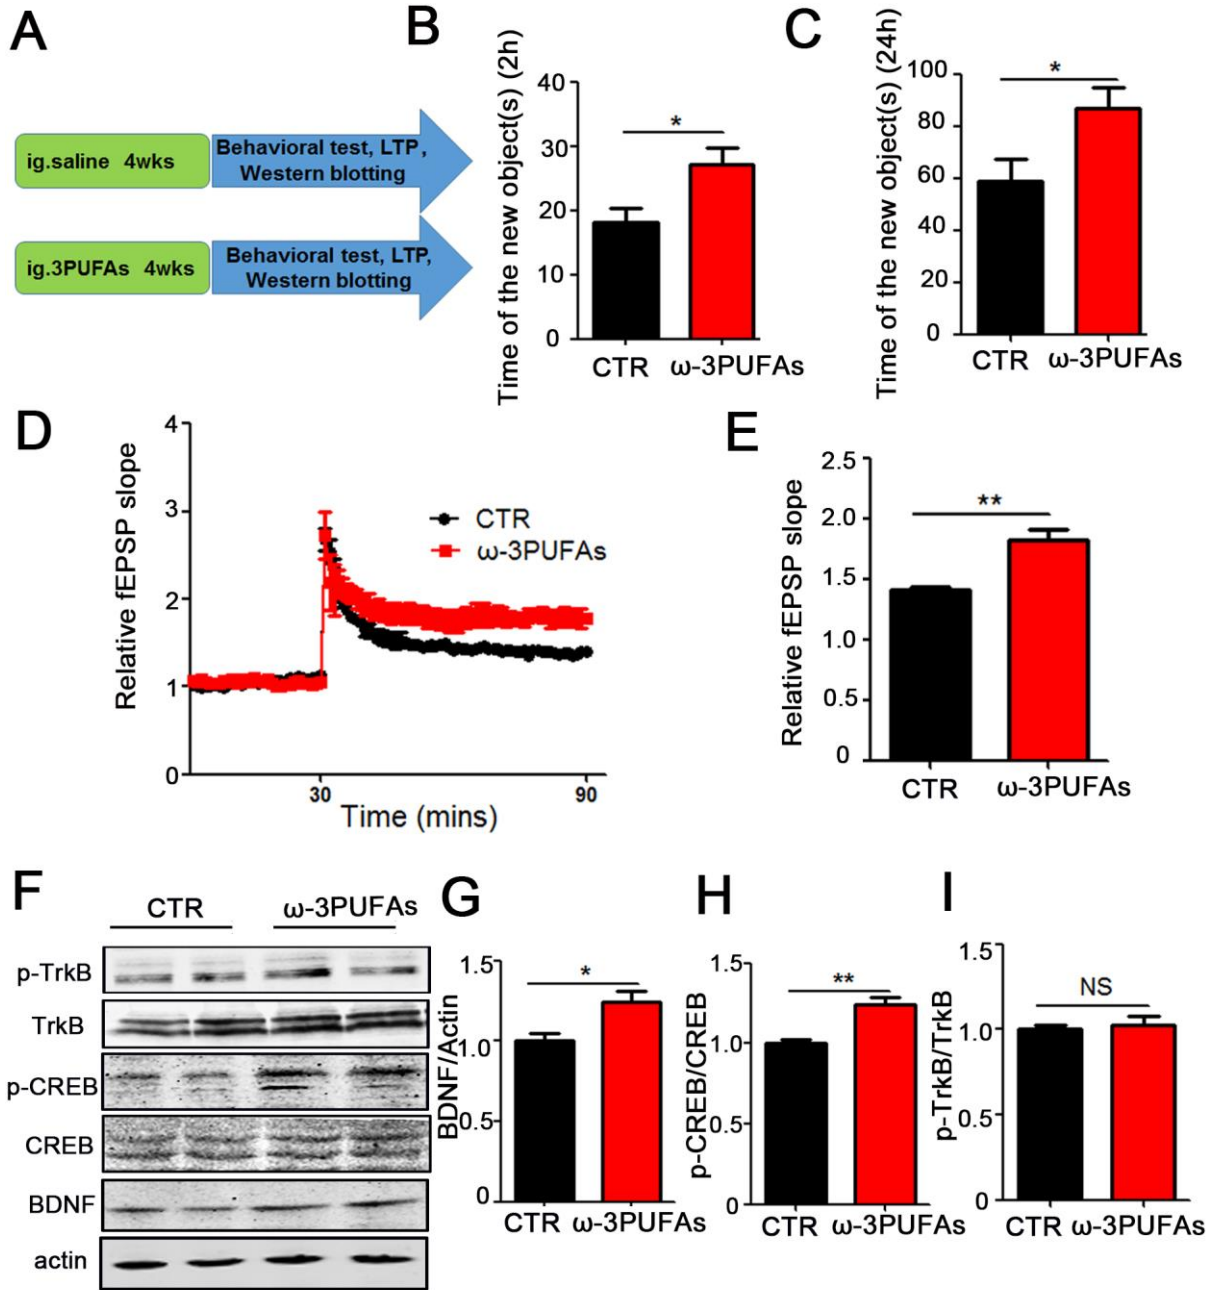

Supplement: 13311_2020_859_MOESM1_ESM.pdf [file 13311_2020_859_MOESM1_ESM.pdf]
